# Supplementary material
Source: publisher figshare collection journal article supplement (https://acs.figshare.com/ndownloader/files/20568315)
Supplement: Supplementary file 1 [file 20568315]

## Supporting Information

### In-situ Formed Hollow Cobalt Sulfide Wrapped by Reduced Graphene Oxide as an Anode for High-Performance Lithium-ion Batteries

Shi-jie Lu<sup>1,2</sup>, Zhi-teng Wang<sup>1,2</sup>, Xia-hui Zhang<sup>3</sup>, Zhen-jiang He<sup>1,2,4\*</sup>, Hui Tong<sup>1,2</sup>, Yun-jiao Li<sup>1,2</sup>, Jun-chao Zheng<sup>1,2\*</sup>

<sup>1</sup>School of Metallurgy and Environment, Central South University, Changsha, Hunan, 410083, China

<sup>2</sup>National Engineering Laboratory for High Efficiency Recovery of Refractory Nonferrous Metals, Changsha, Hunan, 410083, China

<sup>3</sup>School of Mechanical and Materials Engineering, Washington State University, Pullman, WA, 99164, USA.

<sup>4</sup>College of Environmental Science and Engineering, Donghua University, Shanghai 201620, China

**Corresponding Authors:** E-mail: jczheng@csu.edu.cn (j. c. Zheng)

Table S1. Co, S content and Co/S molar ratio of Co<sub>1-x</sub>S and in-situ Co<sub>1-x</sub>S/rGO determined by inductively coupled plasma (ICP).

| Sample                          | Co (wt%) | S (wt%) | Co:S (molar ratio) |
|---------------------------------|----------|---------|--------------------|
| Co <sub>1-x</sub> S             | 26.9     | 15.1    | 0.97               |
| In-situ Co <sub>1-x</sub> S/rGO | 22.8     | 12.0    | 1.03               |

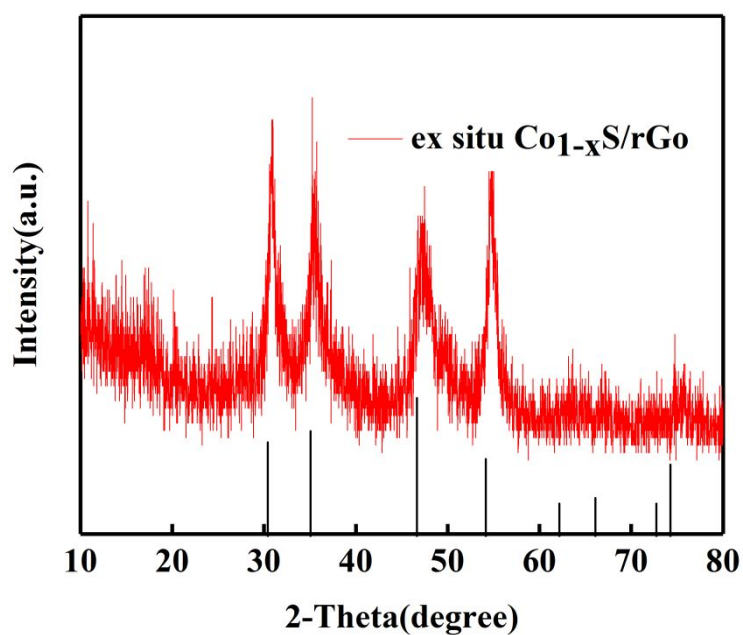

Figure S1. X-ray diffraction patterns of ex-situ  $\text{Co}_{1-x}\text{S}/\text{rGO}$ .

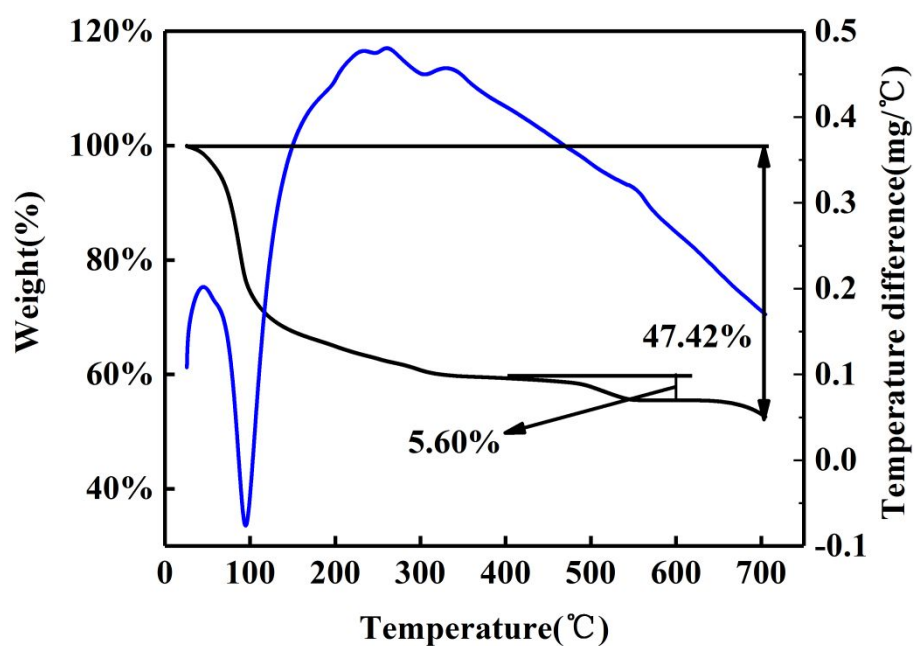

Figure S2. TGA curve for the in-situ  $\text{Co}_{1-x}\text{S}/\text{rGO}$  between room temperature and  $700^{\circ}\text{C}$  measured with a heating rate of  $5^{\circ}\text{C}\cdot\text{min}^{-1}$  under air atmosphere.

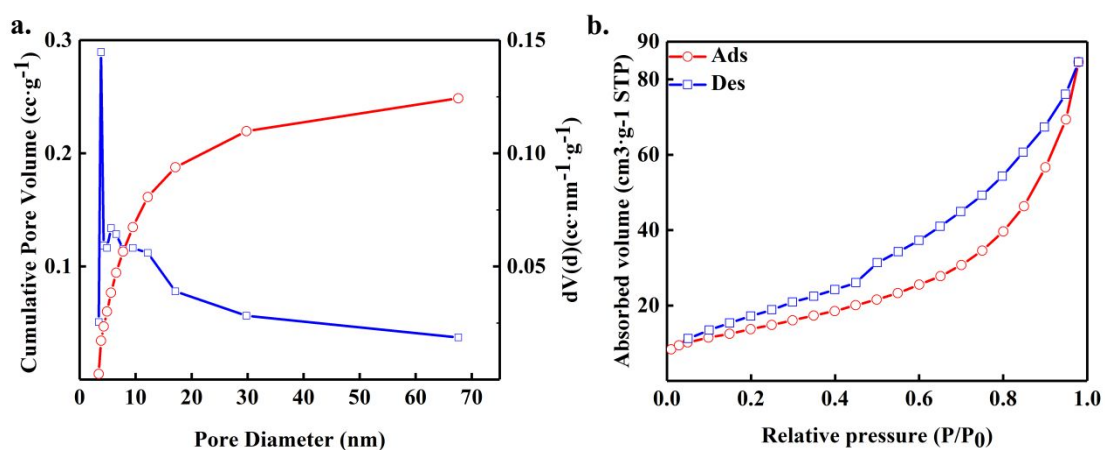

Figure S3. N<sub>2</sub> adsorption-desorption isotherm (a) and pore size distribution curve (b) of the in-situ Co<sub>1-x</sub>S/rGO.

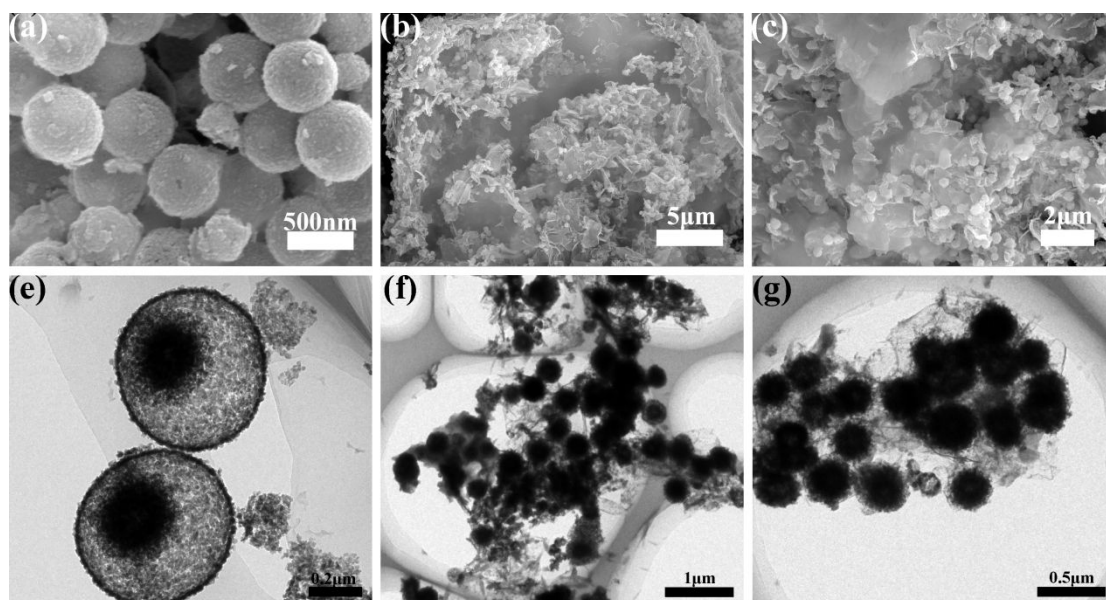

Figure S4. (a-c) SEM images of Co<sub>1-x</sub>S and in-situ Co<sub>1-x</sub>S/rGO. (e-g) TEM images of Co<sub>1-x</sub>S and in-situ Co<sub>1-x</sub>S/rGO.

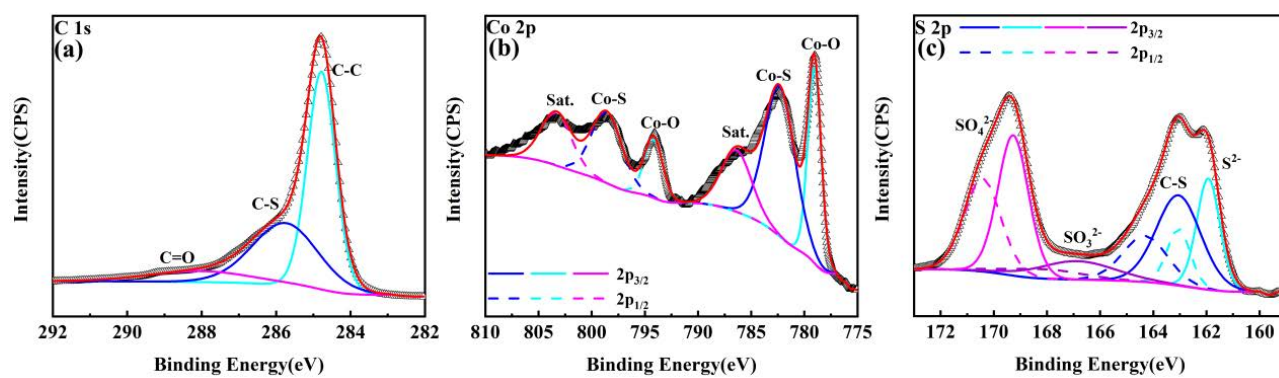

Figure S5. XPS spectra of  $\text{Co}_{1-x}\text{S}$  hollow spheres. (a) C 1s, (b) Co 2p, and (c) S 2p

spectra for  $\text{Co}_{1-x}\text{S}$ .

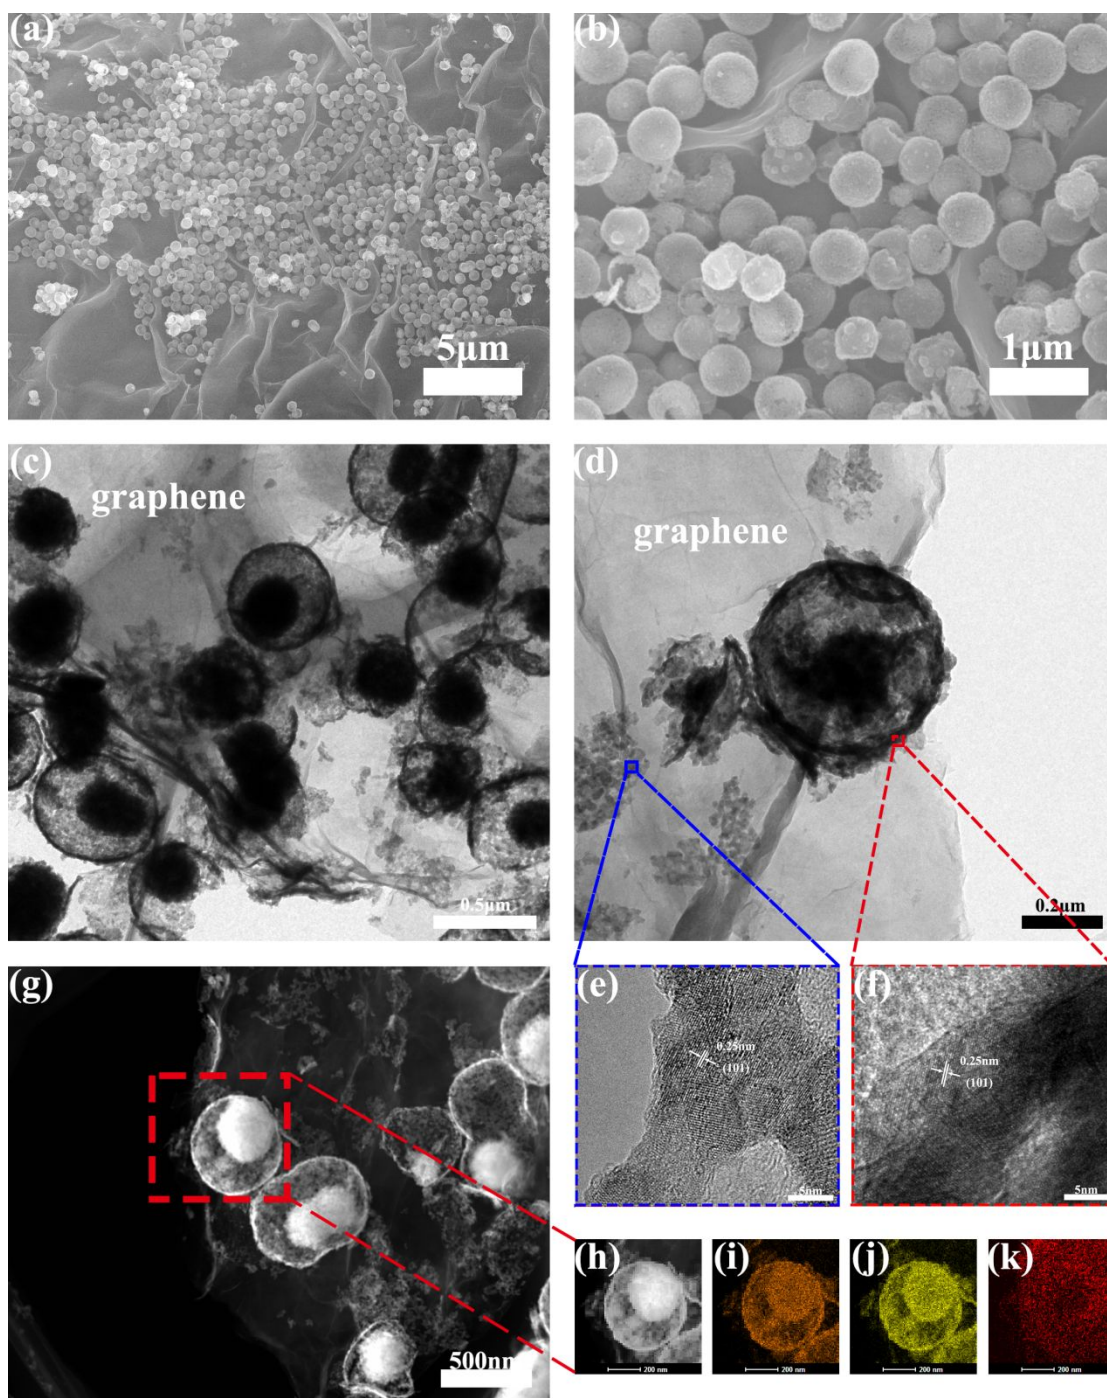

Figure S6. SEM images of ex-situ  $\text{Co}_{1-x}\text{S}/\text{rGO}$  and TEM images, Element mapping and high magnification TEM images of ex-situ  $\text{Co}_{1-x}\text{S}/\text{rGO}$ .

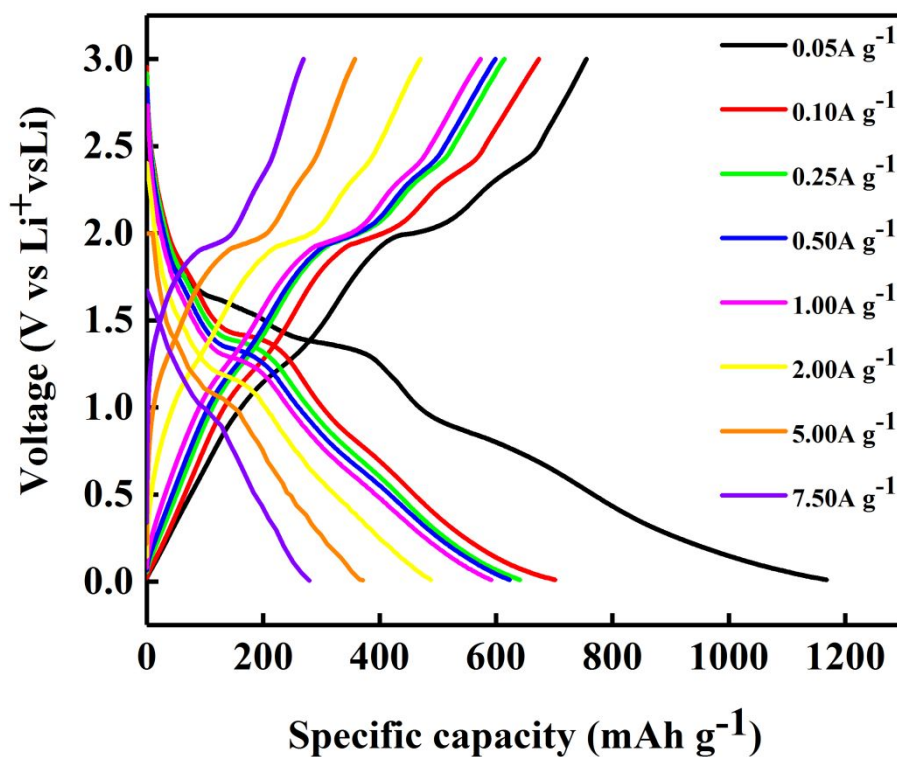

Figure S7. Rate performance of  $\text{Co}_{1-x}\text{S}/\text{rGO}$  electrode at various current densities of 0.05, 0.1, 0.25, 0.5, 1.0, 2.0 and 5.0  $\text{A} \cdot \text{g}^{-1}$ .

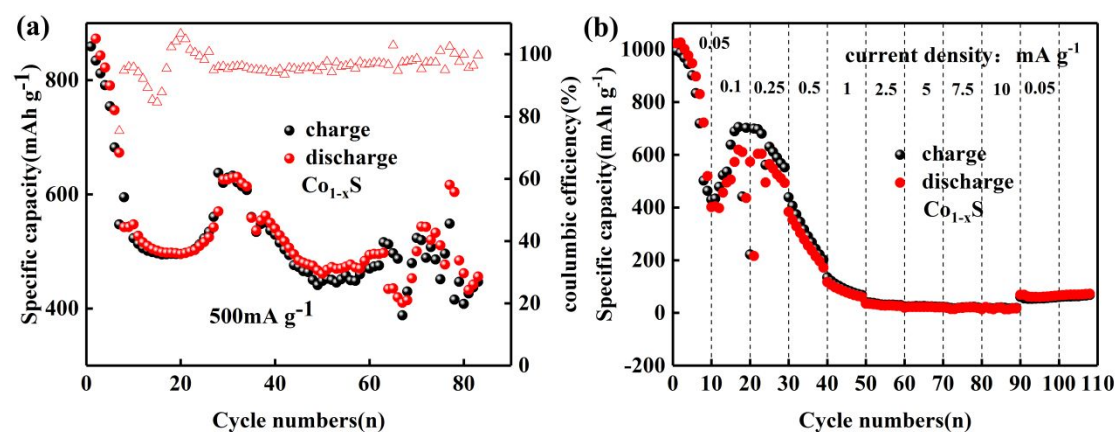

Figure S8. Cycling (a) and rate (b) performance of  $\text{Co}_{1-x}\text{S}$  composite in the voltage range of 0.01-3V.

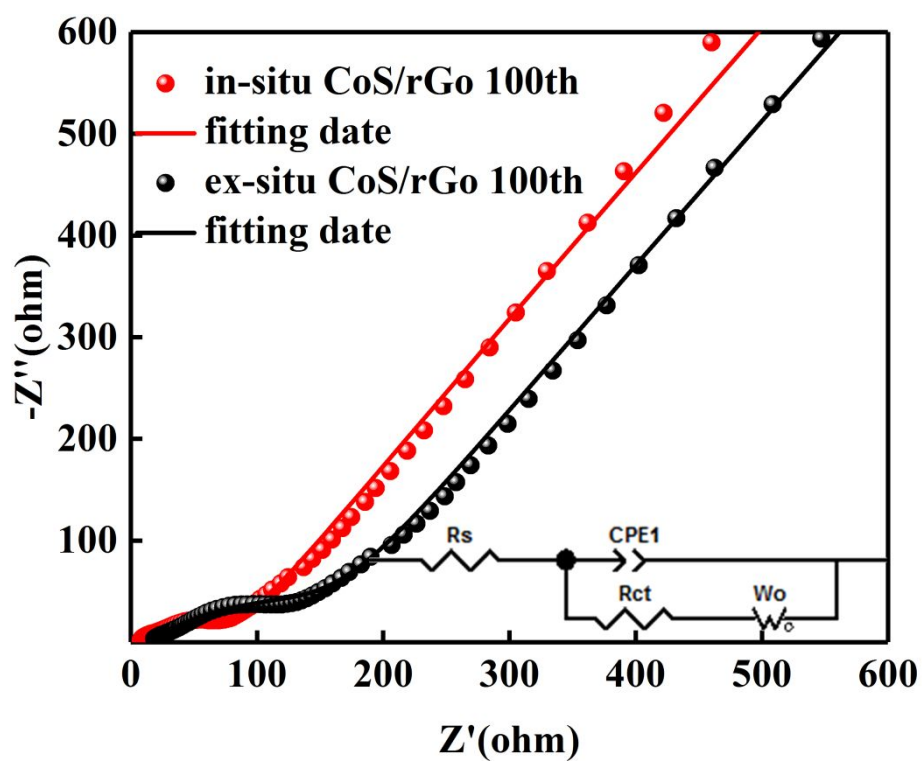

Figure S9. Electrochemical impedance spectra of in-situ  $\text{Co}_{1-x}\text{S/rGO}$  and ex-situ  $\text{Co}_{1-x}\text{S/rGO}$  at a cyclic rate of  $500 \text{ mA}\cdot\text{g}^{-1}$  after 100<sup>th</sup> cycle.

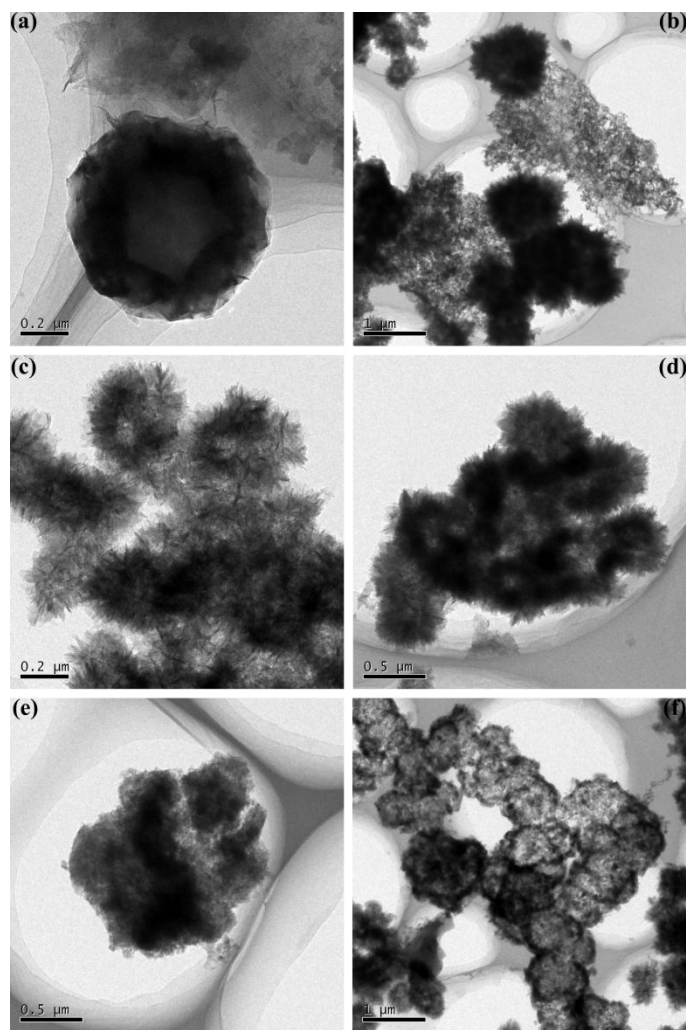

Figure S10. TEM images of in-situ Co<sub>1-x</sub>S/rGO (a, b), ex-situ Co<sub>1-x</sub>S/rGO (c, d), Co<sub>1-x</sub>S (e, f) after 90 cycles.
